# Supplementary material for: PAX4 preserves endoplasmic reticulum integrity preventing beta cell degeneration in a mouse model of type 1 diabetes mellitus
Source: PubMed Central journal article supplement (PMC4779135; doi:10.1007/s00125-016-3864-0), 2016-01-26
Supplement: 125_2016_3864_MOESM1_ESM.pdf [file 125_2016_3864_MOESM1_ESM.pdf]

## ESM Methods

### *The RIP-B7.1 animal model of experimental autoimmune diabetes (EAD)*

The transgenic RIP-B7.1 mouse express the B7 co-stimulatory molecule specifically in beta cell specific. B7 expression overcomes a critical checkpoint in T cell tolerance, thereby inducing EAD after immunisation with a preproinsulin II cDNA encoding plasmid [1, 2]. The RIP-B7.1 model was preferred to the NOD model [3] because of a higher incidence of CD8 T-cell autoimmune-mediated beta cell destruction without gender preponderance and because its insulinitis resembles that seen in type 1 diabetes patients [2, 4].

### *Immunohistochemistry*

Pancreas sections of 7  $\mu\text{m}$  thickness were rehydrated by immersion in decreasing concentration of ethanol. Heat induced antigen retrieval was performed in 0.01M Sodium Citrate Buffer (pH6). In the case of Ki67 and cleaved caspase-3 antigen retrieval was carried out using a pressure cooker. Thereafter, all sections were maintained overnight at 4°C in the presence of primaries antibodies at the indicated dilutions (ESM Table 1). Subsequently, corresponding secondary antibodies (ESM Table 1) were added for 1 h at room temperature, followed by DAPI-nuclear staining (Life Technologies), slides were finally cover slipped using a fluorescent mounting medium (DAKO, Barcelona, Spain).

### *Bioinformatics analysis*

The Robust Multiarray Analysis (RMA) method was applied on a per-chip basis for background correction [5]. Subsequent normalization across arrays and summarization were performed using a quantile algorithm and median-polish, respectively [6] via *oligo* package from Bioconductor (<http://www.bioconductor.org>). A differential gene expression analysis was then performed using the *limma* package [7]. Computed p-values were corrected using the widely accepted False Discovery Rate (FDR) method to harmonize for the multiple comparisons for all the genes [8]. Gene set analysis was achieved for KEGG pathways using the logistic regression model [9] while KEGG annotations for genes in the microarrays were extracted from the Reactome database [10]. Heatmap displaying t-statistic values of differential expression analyses for Pax4 (+DOX versus -DOX) and Pax4R129W (+DOX versus -DOX) were then generated with selected genes of either Pax4 or Pax4R129W associated with the statistically enriched (p-adjusted<0.05) cell cycle and protein processing in ER KEGG pathways.

## References

- [1] Karges W, Pechhold K, Al Dahouk S, et al. (2002) Induction of autoimmune diabetes through insulin (but not GAD65) DNA vaccination in nonobese diabetic and in RIP-B7.1 mice. *Diabetes* 51: 3237-3244
- [2] Karges W, Rajasalu T, Spyranis A, Wieland A, Boehm B, Schirmbeck R (2007) The diabetogenic, insulin-specific CD8 T cell response primed in the experimental autoimmune diabetes model in RIP-B7.1 mice. *Eur J Immunol* 37: 2097-2103
- [3] Anderson MS, Bluestone JA (2005) The NOD mouse: a model of immune dysregulation. *Annu Rev Immunol* 23: 447-485
- [4] Fiorina P (2010) beta-Cells step up in controlling the autoimmune response. *Diabetes* 59: 1861-1864
- [5] Irizarry RA, Hobbs B, Collin F, et al. (2003) Exploration, normalization, and summaries of high density oligonucleotide array probe level data. *Biostatistics* 4: 249-264

- [6] Carvalho BS, Irizarry RA (2010) A framework for oligonucleotide microarray preprocessing. *Bioinformatics* 26: 2363-2367
- [7] Smyth GK (2004) Linear models and empirical bayes methods for assessing differential expression in microarray experiments. *Stat Appl Genet Mol Biol* 3: Article3
- [8] Benjamini Y, Hochberg Y (1995) Controlling the False Discovery Rate: A Practical and Powerful Approach to Multiple Testing. *J Roy Statist Soc Ser B* 57: 289-300
- [9] Montaner D, Dopazo J (2010) Multidimensional gene set analysis of genomic data. *PLoS One* 5: e10348
- [10] Matthews L, Gopinath G, Gillespie M, et al. (2009) Reactome knowledgebase of human biological pathways and processes. *Nucleic Acids Res* 37: D619-622
