# Supplementary material for: PAX4 preserves endoplasmic reticulum integrity preventing beta cell degeneration in a mouse model of type 1 diabetes mellitus
Source: PubMed Central journal article supplement (PMC4779135; doi:10.1007/s00125-016-3864-0), 2016-01-26
Supplement: 125_2016_3864_MOESM2_ESM.pdf [file 125_2016_3864_MOESM2_ESM.pdf]

# ESM Fig. 1

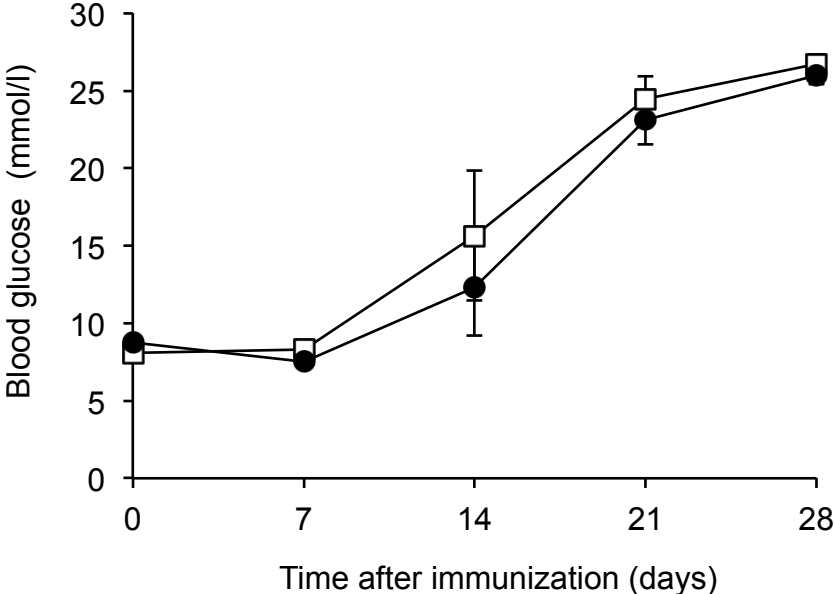

**ESM Fig.1. Development of hyperglycaemia in immunised RIP-B7.1 mice is not altered by DOX treatment.** Blood glucose levels were measured for up to 28 days in immunised RIP-B7.1 mice continuously treated (black circles) or not (white squares) with DOX. *n*=4.
