# Supplementary material for: PAX4 preserves endoplasmic reticulum integrity preventing beta cell degeneration in a mouse model of type 1 diabetes mellitus
Source: PubMed Central journal article supplement (PMC4779135; doi:10.1007/s00125-016-3864-0), 2016-01-26
Supplement: 125_2016_3864_MOESM3_ESM.pdf [file 125_2016_3864_MOESM3_ESM.pdf]

## ESM Fig. 2

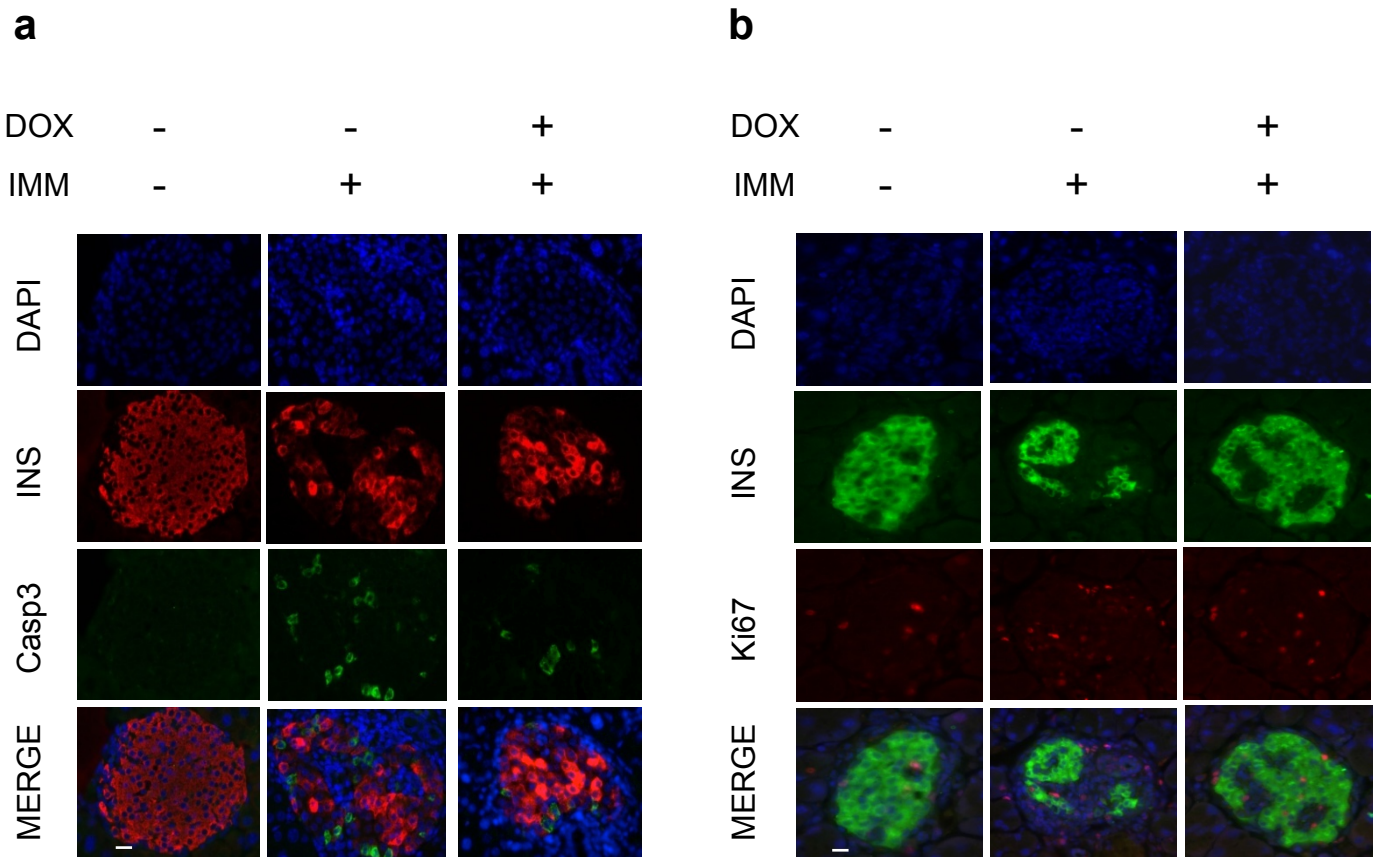

**ESM Fig.2. Assessment of islet cell apoptosis and proliferation in BPTL mice by immunohistochemistry. (a)** Apoptosis detection by immunohistochemical analysis of cleaved CASPASE-3 (Casp3, green) and INSULIN (red) on pancreatic paraffin sections from control, immunized (IMM) or immunized and DOX-treated BPTL mice. Nuclei were stained with DAPI (blue). Representative images correspond to animals killed at 28 to 35 days post immunization. **(b)** Cell proliferation assessment by immunohistochemical analysis of Ki67 (red) and INSULIN (green) on pancreatic paraffin sections from control, immunized (IMM) or immunized and DOX-treated BPTL mice. Nuclei were stained with DAPI (blue). Representative images correspond to animals killed at 28 to 35 days post immunization. Bar, 25  $\mu$ m.
