# Supplementary material for: PAX4 preserves endoplasmic reticulum integrity preventing beta cell degeneration in a mouse model of type 1 diabetes mellitus
Source: PubMed Central journal article supplement (PMC4779135; doi:10.1007/s00125-016-3864-0), 2016-01-26
Supplement: 125_2016_3864_MOESM6_ESM.pdf [file 125_2016_3864_MOESM6_ESM.pdf]

**ESM Table 2:** List of the 20 most highly up- and down-regulated genes (p-value < 0.05) in islets over-expressing Pax4 or Pax4R129W as sorted using the t-statistic algorithm.

| Symbol        | Pax4<br>versus Control | Symbol        | Pax4R129W<br>versus Control |
|---------------|------------------------|---------------|-----------------------------|
| Lgals9        | 6.43                   | 4933402P03Rik | 7.37                        |
| Pax4          | 6.38                   | Scn5a         | 5.93                        |
| Nnat          | 6.05                   | Olf1045       | 5.84                        |
| Soat1         | 5.82                   | Till11        | 5.54                        |
| Nsdhl         | 5.39                   | Hapln3        | 5.44                        |
| Pdyn          | 5.29                   | Proca1        | 5.43                        |
| Rab8a         | 5.25                   | Nudt11        | 5.34                        |
| Cyb5b         | 5.11                   | Esyt3         | 5.31                        |
| Mrps21        | 5.09                   | Tmem200a      | 5.24                        |
| Rit2          | 4.98                   | Edn2          | 4.93                        |
| Rpl37         | -4.12                  | Spry1         | -4.90                       |
| Rps21         | -4.15                  | Meg3          | -4.99                       |
| Rps28         | -4.27                  | Snopc3        | -5.13                       |
| Inmt          | -4.28                  | 2610005L07Rik | -5.36                       |
| Snord8        | -4.36                  | 6820431F20Rik | -5.37                       |
| Snora16a      | -4.45                  | 6720401G13Rik | -5.39                       |
| Snord35b      | -5.25                  | Ddx17         | -5.87                       |
| 4931414P19Rik | -5.40                  | Ankrd12       | -6.16                       |
| Snora34       | -5.64                  | Ddx26b        | -6.31                       |
| Snord104      | -8.10                  | Snora23       | -6.33                       |
