# Supplementary material for: PAX4 preserves endoplasmic reticulum integrity preventing beta cell degeneration in a mouse model of type 1 diabetes mellitus
Source: PubMed Central journal article supplement (PMC4779135; doi:10.1007/s00125-016-3864-0), 2016-01-26
Supplement: 125_2016_3864_MOESM8_ESM.pdf [file 125_2016_3864_MOESM8_ESM.pdf]

**ESM Table 4:** List of significant enriched KEGGs terms (adjusted p-value < 0.05) classified as down regulated in islets overexpressing Pax4 or Pax4R129W.

| Pax4 versus Control        |                           | Pax4R129W versus Control                    |                           |
|----------------------------|---------------------------|---------------------------------------------|---------------------------|
| KEGG Term                  | -log10 (adjusted p-value) | KEGG Term                                   | -log10 (adjusted p-value) |
| Ribosome                   | 28.73                     | Ubiquitin mediated proteolysis              | 7.88                      |
| Cardiac muscle contraction | 1.73                      | Spliceosome                                 | 7.80                      |
|                            |                           | RNA transport                               | 4.40                      |
|                            |                           | Protein processing in endoplasmic reticulum | 3.74                      |
|                            |                           | Ribosome biogenesis in eukaryotes           | 3.74                      |
|                            |                           | Aminoacyl-tRNA biosynthesis                 | 3.00                      |
|                            |                           | mRNA surveillance pathway                   | 2.89                      |
|                            |                           | Prostate cancer                             | 2.62                      |
|                            |                           | Phosphatidylinositol signaling system       | 2.62                      |
|                            |                           | Oocyte meiosis                              | 2.62                      |
|                            |                           | Inositol phosphate metabolism               | 2.33                      |
|                            |                           | Chagas disease (American trypanosomiasis)   | 2.20                      |
|                            |                           | Endocytosis                                 | 1.90                      |
|                            |                           | Lysosome                                    | 1.77                      |
|                            |                           | NOD-like receptor signaling pathway         | 1.77                      |
|                            |                           | Progesterone-mediated oocyte maturation     | 1.75                      |
|                            |                           | Cell cycle                                  | 1.75                      |
|                            |                           | Bacterial invasion of epithelial cells      | 1.75                      |
|                            |                           | Pancreatic cancer                           | 1.50                      |
