# Supplementary material for: PAX4 preserves endoplasmic reticulum integrity preventing beta cell degeneration in a mouse model of type 1 diabetes mellitus
Source: Springer Nature journal article supplement (doi:10.1007/s00125-016-3864-0), 2016-01-26
Supplement: MOESM4 [file 8093544]

### ESM Fig. 3

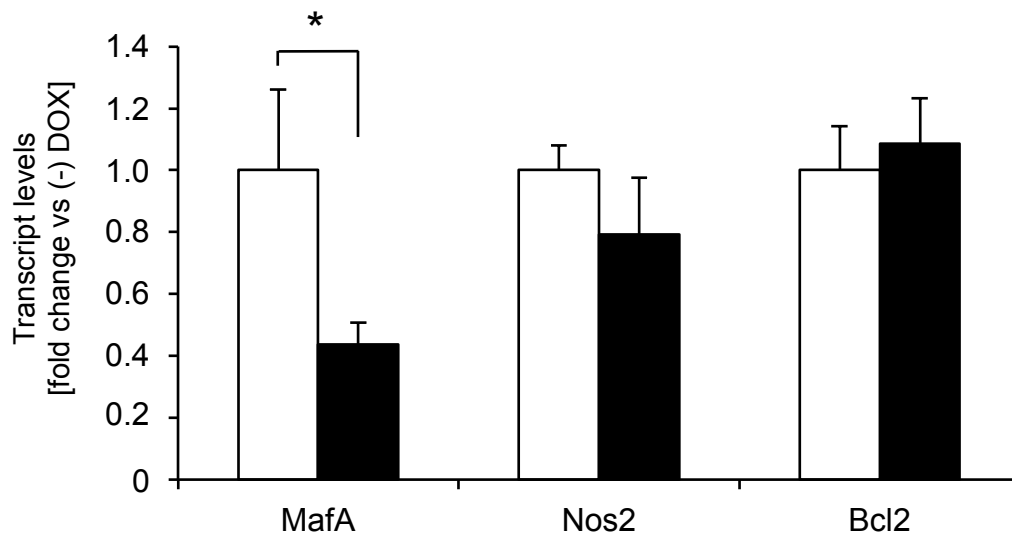

**ESM Fig.3. Assessment of *Mafa*, *Nos2* and *Bcl2* transcript levels in PAX4 overexpressing islets.** *Mafa*, *Nos2* and *Bcl2* transcript levels were measured in islets isolated from PAX4 transgenic mice treated (black bars) or not (white bars) with DOX for 1 month. Relative mRNA levels were normalized to the transcript levels of the housekeeping gene  $\beta$ -*actin*. Data are presented as fold change as compared to non-DOX treated mice.  $n=4$ ,  $*p<0.05$ .
