# Supplementary material for: PAX4 preserves endoplasmic reticulum integrity preventing beta cell degeneration in a mouse model of type 1 diabetes mellitus
Source: Springer Nature journal article supplement (doi:10.1007/s00125-016-3864-0), 2016-01-26
Supplement: MOESM5 [file 8093544]

**ESM Table 1:** Antibodies used in this study.

| <b>Primary Antibody</b>               | <b>Vendor</b>            | <b>Cat. No.</b> | <b>Fold Dilution</b> |
|---------------------------------------|--------------------------|-----------------|----------------------|
| Mouse anti-insulin                    | Sigma                    | I2018-.2ML      | 500                  |
| Rabbit anti-glucagon                  | Cell Signalling          | 2760S           | 200                  |
| Mouse anti-glucagon                   | Sigma                    | G2654-.2ML      | 200                  |
| Rabbit anti-cleaved caspase-3         | Cell Signaling           | 9661            | 150                  |
| Rabbit anti-Ki67                      | Thermo Scientific        | RM-9106-SO      | 150                  |
| Mouse anti-53BP1                      | Santa Cruz Biotechnology | Sc-22760        | 500                  |
|                                       |                          |                 |                      |
| <b>Secondary Antibody</b>             | <b>Vendor</b>            | <b>Cat. No.</b> | <b>Fold Dilution</b> |
| Goat anti-mouse IgG Alexa Fluor 568   | Invitrogen               | A11004          | 1000                 |
| Goat anti-rabbit IgG Alexa Fluor 488  | Invitrogen               | A11008          | 500                  |
| Donkey anti- goat IgG Alexa Fluor 488 | Invitrogen               | A11055          | 500                  |
| Donkey anti-mouse IgG Cy3             | Jackson ImmunoResearch   | 715-175-151     | 800                  |
