# Supplementary material for: PAX4 preserves endoplasmic reticulum integrity preventing beta cell degeneration in a mouse model of type 1 diabetes mellitus
Source: Springer Nature journal article supplement (doi:10.1007/s00125-016-3864-0), 2016-01-26
Supplement: MOESM7 [file 8093544]

**ESM Table 3:** List of significant enriched KEGGs terms (adjusted p-value < 0.05) classified as up regulated in islets either overexpressing Pax4 or Pax4R129W.

| Pax4 versus Control                                    |                           | Pax4R129W versus Control                |                           |
|--------------------------------------------------------|---------------------------|-----------------------------------------|---------------------------|
| KEGG Term                                              | -log10 (adjusted p-value) | KEGG Term                               | -log10 (adjusted p-value) |
| Protein processing in endoplasmic reticulum            | 8.32                      | Neuroactive ligand-receptor interaction | 7.85                      |
| Lysosome                                               | 6.43                      | Cardiac muscle contraction              | 2.62                      |
| Steroid biosynthesis                                   | 6.43                      | Parkinson's disease                     | 1.49                      |
| Cell cycle                                             | 5.93                      | Oxidative phosphorylation               | 1.42                      |
| Pyrimidine metabolism                                  | 4.38                      |                                         |                           |
| Glycosylphosphatidylinositol (GPI)-anchor biosynthesis | 4.34                      |                                         |                           |
| B cell receptor signaling pathway                      | 3.69                      |                                         |                           |
| Antigen processing and presentation                    | 3.38                      |                                         |                           |
| Spliceosome                                            | 3.38                      |                                         |                           |
| Aminoacyl-tRNA biosynthesis                            | 3.21                      |                                         |                           |
| DNA replication                                        | 2.29                      |                                         |                           |
| Cysteine and methionine metabolism                     | 2.28                      |                                         |                           |
| Fc gamma R-mediated phagocytosis                       | 2.27                      |                                         |                           |
| Hepatitis C                                            | 2.27                      |                                         |                           |
| Phagosome                                              | 2.27                      |                                         |                           |
| MAPK signaling pathway                                 | 2.27                      |                                         |                           |
| Glutathione metabolism                                 | 2.19                      |                                         |                           |
| RNA transport                                          | 2.08                      |                                         |                           |
| Biosynthesis of unsaturated fatty acids                | 2.08                      |                                         |                           |
| Glycosaminoglycan degradation                          | 1.97                      |                                         |                           |
| Phenylalanine metabolism                               | 1.85                      |                                         |                           |
| Thyroid cancer                                         | 1.85                      |                                         |                           |
| N-Glycan biosynthesis                                  | 1.85                      |                                         |                           |
| Leishmaniasis                                          | 1.76                      |                                         |                           |
| Fc epsilon RI signaling pathway                        | 1.73                      |                                         |                           |
| Prion diseases                                         | 1.73                      |                                         |                           |
| One carbon pool by folate                              | 1.71                      |                                         |                           |
| Insulin signaling pathway                              | 1.68                      |                                         |                           |
| Endocytosis                                            | 1.66                      |                                         |                           |
| Glycerophospholipid metabolism                         | 1.63                      |                                         |                           |
| Chronic myeloid leukemia                               | 1.63                      |                                         |                           |
| Wnt signaling pathway                                  | 1.63                      |                                         |                           |
| Neurotrophin signaling pathway                         | 1.61                      |                                         |                           |
| Purine metabolism                                      | 1.61                      |                                         |                           |
| Osteoclast differentiation                             | 1.61                      |                                         |                           |
| Rheumatoid arthritis                                   | 1.56                      |                                         |                           |
| p53 signaling pathway                                  | 1.55                      |                                         |                           |
| Drug metabolism - other enzymes                        | 1.50                      |                                         |                           |
| Toxoplasmosis                                          | 1.47                      |                                         |                           |
| Proteasome                                             | 1.43                      |                                         |                           |
| Glycolysis / Gluconeogenesis                           | 1.43                      |                                         |                           |
| Pentose phosphate pathway                              | 1.42                      |                                         |                           |
| Jak-STAT signaling pathway                             | 1.42                      |                                         |                           |
| Mismatch repair                                        | 1.36                      |                                         |                           |
| Citrate cycle (TCA cycle)                              | 1.36                      |                                         |                           |
| Nucleotide excision repair                             | 1.35                      |                                         |                           |
| Acute myeloid leukemia                                 | 1.35                      |                                         |                           |
